# Supplementary material for: From Early Smoking to COPD and other Chronic Respiratory Disease: Unraveling the Roles of Chemical Pollutants and Underlying Toxicological Mechanisms
Source: Research Square preprint supplement (doi:10.21203/rs.3.rs-8371684/v1), 2026-01-15
Supplement: Supplementary file 1 [file c1ba5620a05216d2ace4dc51.docx]

**Supplement Table 1 the relationship between the age started smoking and prevalence of chronic lower respiratory disease in UKB**

| Diseases |  | Smoking | | | *P* for trend |
| --- | --- | --- | --- | --- | --- |
| No-smoking group | Late-smoking group | Early-smoking group |
| asthma | UKB |  |  |  |  |
| Model 1 OR (95% CI) *P*-value | 1 | 1.00 [0.86,1.15]  0.971 | 1.02 [0.97,1.07]  0.508 | 0.517 |
| Model 2 OR (95% CI) *P*-value | 1 | 1.01 [0.87,1.16]  0.929 | 1.02 [0.97,1.08]  0.382 | 0.382 |
| Model 3 OR (95% CI) *P*-value | 1 | 1.06 [0.90,1.23]  0.493 | 1.02 [0.94,1.12]  0.595 | 0.570 |
| bronchiectasis | UKB |  |  |  |  |
| Model 1 OR (95% CI) *P*-value | 1 | 0.79 [0.49,1.21]  0.320 | 1.32 [1.16,1.49]  <0.001 | <0.001 |
| Model 2 OR (95% CI) *P*-value | 1 | 0.75 [0.46,1.15]  0.225 | 1.22 [1.07,1.39]  0.002 | 0.004 |
| Model 3 OR (95% CI) *P*-value | 1 | 0.81 [0.48,1.27]  0.388 | 1.24 [0.98,1.56]  0.068 | 0.080 |
| pneumoconiosis | UKB |  |  |  |  |
| Model 1 OR (95% CI) *P*-value | 1 | 2.03 [0.50,5.41]  0.228 | 3.46 [2.42,4.88]  <0.001 | <0.001 |
| Model 2 OR (95% CI) *P*-value | 1 | 1.41 [0.35,3.80]  0.557 | 2.31 [1.60,3.31]  <0.001 | <0.001 |
| Model 3 OR (95% CI) *P*-value | 1 | 1.81 [0.37,6.77]  0.412 | 2.96 [1.20,7.38]  0.019 | 0.081 |

Model 1 didn’t adjust for any covariates. Model 2 was adjusted for age, sex, ethnic, education and socioeconomic status. Model 3 was further adjusted for BMI, Pack year of smoking, alcohol consumption, MET and depression, and other covariates based on model 2.

**Supplement Table 2 326 differential expression proteins in early-smoking group**

| Protein | estimate | p.value |
| --- | --- | --- |
| ACAN | -0.05127031 | 5.68E-05 |
| ACHE | -0.046056078 | 0.001498809 |
| ACVRL1 | 0.043544917 | 3.90E-05 |
| ADA2 | -0.053698559 | 0.004136703 |
| ADAM22 | -0.040543786 | 0.00834037 |
| ADAM8 | 0.035544124 | 0.005296864 |
| ADGRE2 | -0.046894532 | 0.000172154 |
| ADGRE5 | -0.050670619 | 0.000135106 |
| ALDH3A1 | 0.12928218 | 9.03E-06 |
| ALPP | 0.495656469 | 1.11E-29 |
| AMY1A_AMY1B_AMY1C | -0.067440956 | 0.003361061 |
| AMY2A | -0.041510201 | 0.049210492 |
| AMY2B | -0.047032592 | 0.028821818 |
| ANGPT2 | 0.059281918 | 0.000520173 |
| ANK2 | -0.064711655 | 0.041626023 |
| AOC3 | 0.028270579 | 0.034746625 |
| APLP1 | -0.064862051 | 0.005240324 |
| APOA4 | 0.039046515 | 0.015929849 |
| AREG | 0.072838402 | 0.000352871 |
| ARNT | -0.040578665 | 0.018573979 |
| ASGR1 | 0.026797787 | 0.040566734 |
| ATRN | -0.016673129 | 0.023506575 |
| AXL | -0.034378167 | 0.004609504 |
| BABAM1 | -0.036345553 | 0.007077088 |
| BCAN | -0.060169133 | 9.30E-05 |
| BCL2 | 0.057280664 | 0.019812447 |
| BDNF | 0.075216401 | 0.04327472 |
| BGN | -0.110458933 | 0.039375305 |
| BLMH | -0.044253488 | 0.001726518 |
| BOC | -0.023348828 | 0.025632986 |
| BPIFB1 | 0.112858769 | 9.77E-05 |
| C1QA | -0.021302602 | 0.03531484 |
| CA4 | 0.023649763 | 0.02576698 |
| CA7 | 0.0346712 | 0.026483265 |
| CADPS | 0.043238381 | 0.024488543 |
| CBLIF | 0.080033733 | 0.013683699 |
| CBLN4 | -0.036077839 | 0.011902312 |
| CCDC28A | 0.026663983 | 0.042791953 |
| CCL11 | 0.079235705 | 3.46E-06 |
| CCL22 | 0.058582827 | 0.011141485 |
| CCN4 | 0.036203839 | 0.045461869 |
| CCN5 | -0.039089773 | 0.024668387 |
| CCNE1 | -0.123272007 | 0.005601488 |
| CD200 | -0.029218847 | 0.013704536 |
| CD207 | 0.086001871 | 5.68E-07 |
| CD244 | -0.030561806 | 0.010785346 |
| CD248 | -0.0706559 | 6.54E-05 |
| CD300LG | -0.035327825 | 0.03380621 |
| CD5 | 0.044630957 | 0.00286626 |
| CD6 | 0.075173411 | 0.001322793 |
| CD72 | -0.047341436 | 0.012277106 |
| CD83 | 0.052931263 | 0.000251763 |
| CDA | -0.057877554 | 0.006860534 |
| CDCP1 | 0.060551621 | 0.007263178 |
| CDHR5 | -0.036133913 | 0.034568322 |
| CEACAM5 | 0.175804829 | 2.12E-10 |
| CEACAM6 | 0.118707431 | 2.81E-12 |
| CEBPA | -0.037845071 | 0.030710087 |
| CELSR2 | -0.031461749 | 0.014622246 |
| CHCHD10 | 0.036758951 | 0.042223018 |
| CLEC10A | 0.053647451 | 0.000818999 |
| CLEC14A | 0.029195585 | 0.034174189 |
| CLEC4D | 0.063024649 | 0.024895919 |
| CLEC5A | 0.028107816 | 0.031224411 |
| CLEC6A | 0.057726184 | 0.00638958 |
| CNTN1 | -0.038753758 | 0.001398764 |
| CNTN4 | -0.024445058 | 0.021319383 |
| CNTN5 | -0.056285282 | 0.000626076 |
| CNTNAP4 | -0.115146344 | 0.017816894 |
| COL24A1 | 0.090944987 | 0.00038744 |
| COL9A1 | -0.061284606 | 0.003711624 |
| CPOX | 0.032547718 | 0.006744705 |
| CR1 | -0.032997169 | 0.035020688 |
| CRHBP | 0.029493 | 0.018268399 |
| CRIM1 | -0.018106076 | 0.045719513 |
| CRTAM | -0.076655363 | 0.000562346 |
| CSF2RB | -0.04335787 | 0.027063431 |
| CSNK1D | -0.076019767 | 0.009342333 |
| CSPG4 | -0.056708475 | 9.14E-05 |
| CXCL10 | -0.063347332 | 0.035165077 |
| CXCL14 | 0.096475542 | 0.000455889 |
| CXCL16 | 0.023407754 | 0.025098047 |
| CXCL17 | 0.23858923 | 1.55E-41 |
| DCC | -0.023321991 | 0.02085411 |
| DCN | -0.021323975 | 0.034079965 |
| DIPK2B | -0.025542653 | 0.037097326 |
| DKK4 | -0.044933044 | 0.028017901 |
| DNAJA1 | -0.050024981 | 0.016596027 |
| DNM3 | 0.048470941 | 0.049557355 |
| DPP6 | -0.067854867 | 5.14E-06 |
| DPT | -0.036041103 | 0.001931775 |
| DRAXIN | -0.063129881 | 0.000987429 |
| DSG2 | -0.028101086 | 0.017804454 |
| EBI3_IL27 | -0.034922789 | 0.009105412 |
| EDIL3 | 0.090923533 | 2.45E-09 |
| EDN1 | 0.049688273 | 0.000143047 |
| EGFR | -0.020320169 | 0.004833081 |
| ENG | 0.016367983 | 0.031415229 |
| ENPP5 | -0.065240404 | 0.000804387 |
| ENTPD2 | -0.050433728 | 0.009564838 |
| EPHA4 | -0.036876359 | 0.003304916 |
| ERI1 | 0.044665411 | 0.003956707 |
| ESM1 | -0.04154674 | 0.006880071 |
| ESR1 | -0.077590665 | 0.003830243 |
| EXTL1 | -0.053852671 | 0.011774632 |
| FABP2 | 0.092031272 | 0.008581368 |
| FAM3B | 0.065510418 | 6.19E-05 |
| FASLG | -0.037318032 | 0.023296459 |
| FBLN2 | -0.035956843 | 0.010040542 |
| FCRL5 | -0.067398116 | 0.008904529 |
| FGF21 | 0.13133159 | 0.012182739 |
| FGFBP1 | -0.049393984 | 0.000725952 |
| FOLH1 | -0.194323696 | 0.000125696 |
| FOLR1 | 0.04095226 | 0.000983169 |
| FUT3_FUT5 | 0.042060415 | 0.03897238 |
| FZD8 | 0.048205146 | 0.012449421 |
| GABARAPL1 | -0.059391832 | 0.045256123 |
| GAD2 | -0.048717224 | 0.019197588 |
| GAL | -0.06352051 | 0.028199262 |
| GALNT3 | -0.042753273 | 0.023276708 |
| GCHFR | 0.083233247 | 0.000287405 |
| GDF15 | 0.065835008 | 0.000353678 |
| GFAP | -0.051676165 | 0.01236981 |
| GFOD2 | -0.111564868 | 0.047017021 |
| GFRAL | -0.078849573 | 0.00521792 |
| GHRL | 0.194109904 | 6.26E-08 |
| GLI2 | -0.032840082 | 0.034693768 |
| GLO1 | 0.053653565 | 0.042279048 |
| GPC1 | -0.046832751 | 0.000247251 |
| GPD1 | 0.050846992 | 0.032037086 |
| GSN | -0.031861439 | 9.82E-05 |
| GSR | -0.02398494 | 0.015872558 |
| GSTP1 | -0.070994019 | 0.021150499 |
| GZMA | -0.0330423 | 0.033698402 |
| GZMH | -0.077068842 | 0.027337547 |
| HAVCR1 | 0.066758264 | 0.015546107 |
| HBZ | 0.109364552 | 0.021441107 |
| HDAC8 | -0.081200347 | 0.005086603 |
| HEPACAM2 | -0.043677222 | 0.018709482 |
| HEPH | 0.03349116 | 0.003784702 |
| HK2 | -0.02873219 | 0.020866509 |
| HMMR | -0.047421749 | 0.031020915 |
| HMOX1 | -0.046299449 | 0.027323219 |
| HS3ST3B1 | 0.045828679 | 0.006590116 |
| HSDL2 | -0.049500829 | 0.0219891 |
| HYAL1 | 0.02072435 | 0.039999947 |
| ICAM1 | 0.037799816 | 0.002489606 |
| ICAM5 | 0.15976429 | 4.57E-15 |
| IFNGR1 | -0.017811411 | 0.048483364 |
| IGDCC4 | -0.048437036 | 4.18E-05 |
| IGFBP4 | 0.058820224 | 0.001575538 |
| IGSF21 | -0.047745316 | 0.006855392 |
| IKZF2 | -0.08374094 | 0.048138174 |
| IL12A_IL12B | -0.078096131 | 0.022851011 |
| IL12B | -0.070598214 | 0.00337186 |
| IL12RB2 | -0.066731654 | 0.000426533 |
| IL15 | 0.049297816 | 0.000807005 |
| IL17RA | -0.040186643 | 0.043330002 |
| IL19 | 0.069087568 | 0.027578879 |
| IL1RL2 | -0.05023233 | 0.003486361 |
| IL22 | 0.112721954 | 0.000130762 |
| IL7 | -0.059853943 | 0.038696498 |
| IL7R | -0.05933511 | 0.00960919 |
| ITGA11 | -0.044668094 | 0.002900858 |
| ITGAL | -0.042794922 | 0.031153616 |
| ITGAM | -0.034094014 | 0.015768592 |
| ITGB2 | -0.045380672 | 0.000383258 |
| ITGB6 | -0.027800987 | 0.037507834 |
| ITM2A | -0.066886895 | 0.011929444 |
| ITPA | 0.063436945 | 0.03442837 |
| ITPR1 | 0.066904163 | 0.030952576 |
| IZUMO1 | -0.053984773 | 0.012421769 |
| JCHAIN | 0.087109677 | 0.001474666 |
| KAZALD1 | -0.044704283 | 0.024093117 |
| KDM3A | -0.155469011 | 0.00031116 |
| KITLG | -0.059399747 | 0.0002453 |
| KLK10 | 0.050606567 | 0.004218151 |
| KLK11 | 0.028507862 | 0.033271647 |
| KLK13 | 0.052888244 | 0.00654931 |
| KLKB1 | 0.026789369 | 0.017087133 |
| KLRD1 | -0.047239011 | 0.023004862 |
| KRT14 | -0.029177031 | 0.025339537 |
| L1CAM | 0.028718729 | 0.026140126 |
| LACRT | 0.049183443 | 0.03015619 |
| LAMP3 | 0.202901612 | 6.06E-20 |
| LEG1 | 0.083138684 | 0.008009211 |
| LGALS3 | -0.032121424 | 0.0154427 |
| LGALS4 | 0.057817746 | 0.015635821 |
| LILRB1 | -0.033547171 | 0.006238415 |
| LILRB2 | -0.030394811 | 0.048686456 |
| LIPF | 0.137399862 | 4.08E-07 |
| LRRN1 | -0.05545233 | 0.001469421 |
| LTA4H | 0.063544897 | 0.014197018 |
| LY75 | -0.036819549 | 0.033391983 |
| LY9 | -0.030107031 | 0.021805537 |
| LYPD3 | 0.032258007 | 0.032779492 |
| MAMDC4 | 0.055368302 | 0.018393306 |
| MAPRE3 | -0.133633819 | 0.048278204 |
| MAPT | -0.047503641 | 0.041670738 |
| MARCO | -0.030178304 | 0.010731061 |
| MCAM | -0.048011534 | 0.001076569 |
| MEP1A | 0.079979315 | 0.012188369 |
| MERTK | -0.029390828 | 0.009349137 |
| METAP1 | -0.029826475 | 0.022668756 |
| MIA | -0.045054187 | 0.005330663 |
| MKI67 | -0.049612125 | 0.005786293 |
| MLN | 0.095598896 | 0.016303129 |
| MMP10 | 0.055029045 | 0.035362399 |
| MMP12 | 0.091649061 | 5.52E-05 |
| MMP8 | 0.072565501 | 0.028727257 |
| MMP9 | 0.077432039 | 0.004990262 |
| MSLN | 0.194436277 | 4.96E-17 |
| MSMB | 0.117614823 | 0.000148849 |
| MSTN | -0.101883457 | 1.26E-05 |
| MYOC | -0.04828593 | 0.018566328 |
| NADK | -0.066787461 | 0.008185233 |
| NAGA | -0.05721147 | 0.039043992 |
| NCAM1 | -0.058501237 | 1.10E-05 |
| NCAN | -0.08636336 | 3.60E-07 |
| NCR3LG1 | -0.04348843 | 0.003822442 |
| NEDD9 | -0.048399447 | 0.001977565 |
| NELL2 | -0.028344018 | 0.028289812 |
| NOTCH1 | -0.021125752 | 0.002129753 |
| NOTCH2 | -0.031159573 | 0.001684361 |
| NOTCH3 | -0.054086092 | 0.000348666 |
| NPC2 | 0.038760466 | 0.005183321 |
| NPM1 | 0.128859349 | 0.026157954 |
| NPR1 | -0.053104274 | 0.006017398 |
| NRCAM | -0.038210966 | 0.002030997 |
| NRP2 | -0.027434284 | 0.03113081 |
| NT5E | -0.051583845 | 0.042938214 |
| NTRK2 | -0.037838601 | 0.000849746 |
| NTRK3 | -0.042242326 | 1.34E-05 |
| NUBP1 | -0.089266614 | 0.049307684 |
| OCLN | 0.074142771 | 0.00011942 |
| ODAM | -0.087015793 | 0.00024751 |
| OMD | -0.08378016 | 1.39E-05 |
| OMG | -0.07957183 | 0.007436538 |
| OPTC | -0.062850689 | 0.0016473 |
| OSM | 0.095065499 | 0.00332266 |
| PCDH17 | -0.053024768 | 0.000652014 |
| PCDH9 | -0.074100311 | 8.47E-07 |
| PGA4 | 0.141927274 | 3.39E-06 |
| PGLYRP2 | 0.03284444 | 0.014795587 |
| PGR | -0.145845785 | 0.002803946 |
| PIGR | 0.121639615 | 9.29E-15 |
| PKN3 | 0.079966948 | 0.017275613 |
| PLAUR | 0.056047053 | 2.49E-06 |
| PLCB1 | -0.074390752 | 0.000234423 |
| PLTP | -0.033931416 | 0.029639732 |
| PLXDC1 | -0.037001031 | 0.01657938 |
| PLXNB2 | -0.02506667 | 0.017586726 |
| PODXL2 | -0.024637186 | 0.043079428 |
| POLR2A | -0.02717763 | 0.047352014 |
| POMC | -0.135532622 | 1.43E-05 |
| PPIE | 0.064139407 | 0.021267572 |
| PPP3R1 | -0.055424224 | 0.002839937 |
| PRL | -0.090532532 | 0.007523017 |
| PRND | 0.052460093 | 0.01937899 |
| PRSS8 | 0.103908934 | 6.21E-09 |
| PSPN | 0.10320536 | 0.017504843 |
| PTGR1 | 0.096213768 | 0.007920784 |
| PTPRB | 0.032490735 | 0.01197493 |
| PTPRH | -0.063588841 | 0.00355034 |
| PTPRM | -0.024577382 | 0.023892131 |
| RAB6A | -0.040972592 | 0.049573257 |
| RBP2 | 0.084826623 | 0.013454368 |
| REG3G | 0.043120296 | 0.015318463 |
| REG4 | 0.065950173 | 0.002414988 |
| REN | 0.067591239 | 0.038496936 |
| RGMA | -0.044334258 | 0.001361784 |
| RNF149 | 0.029733465 | 0.02909483 |
| RNF31 | -0.040120481 | 0.019359431 |
| ROBO1 | -0.023870573 | 0.026086681 |
| ROBO2 | 0.022764806 | 0.024416952 |
| RPA2 | -0.034799648 | 0.01502565 |
| RTN4R | -0.040479708 | 0.006365438 |
| S100G | 0.083046305 | 3.38E-05 |
| S100P | -0.055233384 | 0.027978439 |
| SCGB1A1 | -0.09860447 | 2.65E-05 |
| SCGB3A1 | 0.056454709 | 7.90E-07 |
| SCGB3A2 | 0.140349628 | 9.80E-05 |
| SEMA4C | -0.030401572 | 0.012567133 |
| SEMA6C | -0.043079827 | 0.000357517 |
| SEMA7A | -0.029524501 | 0.015977705 |
| SEPTIN7 | -0.052137288 | 0.029102328 |
| SUSD2 | 0.055374201 | 1.17E-05 |
| SUSD5 | -0.047787871 | 0.001535061 |
| SYNGAP1 | -0.050087586 | 0.045634187 |
| TEK | -0.022367262 | 0.020825523 |
| TFF1 | 0.107019997 | 0.001851096 |
| TFF2 | 0.117963731 | 2.39E-06 |
| THSD1 | -0.031423034 | 0.037852214 |
| TINAGL1 | -0.042415408 | 1.20E-05 |
| TLR1 | -0.02736428 | 0.022052113 |
| TMPRSS5 | -0.042438653 | 0.013263328 |
| TNFRSF10B | 0.064788111 | 0.000324998 |
| TNFRSF12A | 0.036082011 | 0.020411618 |
| TNFRSF4 | 0.033349364 | 0.0425387 |
| TNFRSF6B | 0.060345728 | 0.013436293 |
| TNFSF12 | -0.028089147 | 0.029399205 |
| TNFSF13 | 0.029267169 | 0.014115461 |
| TNFSF13B | 0.025383086 | 0.034717545 |
| TNR | -0.128128167 | 9.14E-12 |
| TOP1 | -0.117809638 | 0.020935765 |
| TP53BP1 | -0.137096752 | 0.000572476 |
| TPSG1 | -0.024353741 | 0.046955184 |
| TPT1 | -0.078312301 | 0.006641278 |
| TREH | 0.068840684 | 0.038831506 |
| TREM2 | 0.049190958 | 0.032366264 |
| TSHB | -0.070610863 | 0.039915927 |
| TSPAN7 | -0.121497045 | 0.005831639 |
| UMOD | -0.054087171 | 0.024386965 |
| UPK3BL1 | 0.052486622 | 0.026568991 |
| VEGFB | -0.046885763 | 0.000312942 |
| VEGFD | 0.036104072 | 0.023437954 |
| VMO1 | 0.085757487 | 0.004483392 |
| VSIG2 | 0.101001778 | 6.29E-05 |
| VWA1 | 0.057846709 | 0.00174634 |
| WFDC1 | 0.050469715 | 0.035742824 |
| WFDC12 | 0.056241086 | 0.049461375 |
| WFDC2 | 0.147376886 | 1.27E-18 |
| WFIKKN2 | -0.036648761 | 0.016586987 |
| YY1 | -0.035858552 | 0.004775051 |
| ZBP1 | -0.05236302 | 0.006500295 |
| ZPR1 | 0.095430532 | 0.022640086 |

**Supplement Table 3 potential targets of COPD, chronic bronchitis and interstitial pulmonary diseases overlapping to the 326 differential expression proteins**

| COPD overlapping target | chronic bronchitis overlapping target | interstitial pulmonary diseases overlapping target |
| --- | --- | --- |
| HMOX1 | HMOX1 | ENG |
| NOTCH1 | BCL2 | ACVRL1 |
| NOTCH2 | NOTCH1 | CSF2RB |
| EGFR | MMP9 | HMOX1 |
| MAPT | CCL11 | EGFR |
| ENG | EGFR | NPC2 |
| NPC2 | GSTP1 | MAPT |
| REN | CXCL10 | EDN1 |
| MMP9 | IL17RA | NOTCH1 |
| UMOD | MMP12 | MMP9 |
| GFAP | NOTCH2 | UMOD |
| BDNF | IL7R | REN |
| BCL2 | ICAM1 | NOTCH3 |
| EDN1 | ITGB2 | ICAM1 |
| ICAM1 | EDN1 | NOTCH2 |
| NOTCH3 | REN | IL12B |
| SCGB1A1 | UMOD | FASLG |
| NAGA | BDNF | GFAP |
| CCL11 | IFNGR1 | BDNF |
| ESR1 | ENG | ITGAM |
| IL7R | ESR1 | L1CAM |
| FASLG | FASLG | ESR1 |
| IL12B | IL12B | BCL2 |
| GSTP1 | SCGB1A1 | IL7R |
| TREM2 | NPM1 | CXCL10 |
| ITGAM | ITGAM | NAGA |
| CXCL10 | KITLG | GSN |
| ACHE | CEBPA | NTRK2 |
| ITGB2 | GSR | SCGB1A1 |
| IFNGR1 | POMC | IFNGR1 |
| ACVRL1 | TNFSF13B | MMP12 |
| IL17RA | TNFSF12 | ITPR1 |
| NTRK2 | IL7 | ACHE |
| L1CAM | NOTCH3 | CCL11 |
| ADA2 | ITGAL | DCN |
| POMC | IL15 | TEK |
| MMP12 | ACVRL1 | NT5E |
| CHCHD10 | CD5 | ITGB2 |
| GHRL | MMP8 | CR1 |
| ITPR1 | ADA2 | GSTP1 |
| KITLG | CEACAM6 | MMP8 |
| NPM1 | MAPT | ACAN |
| IL7 | IL22 | IL22 |
| GSR | CCL22 | CEBPA |
| IL15 | NPC2 | LGALS3 |
| NTRK3 | LGALS3 | POMC |
| IL22 | CR1 | GLI2 |
| TNFSF13B | HAVCR1 | ITGB6 |
| CEBPA | TNFRSF10B | KITLG |
| CR1 | GSN | NTRK3 |
| AXL | NT5E | ADA2 |
| GSN | NCAM1 | ANGPT2 |
| PRL | TEK | COL9A1 |
| CSF2RB | TNFSF13 | IL7 |
| LGALS3 | TNFRSF4 | BGN |
| ANGPT2 | TP53BP1 | ROBO2 |
| CEACAM6 | TLR1 | TNFSF13B |
| CPOX | TPT1 | MERTK |
| HAVCR1 | KLRD1 | GDF15 |
| GDF15 | ITPR1 | CCL22 |
| NT5E | DCN | AXL |
| MMP8 | LTA4H | YY1 |
| HYAL1 | MKI67 | APOA4 |
| ITGAL | AOC3 | IL15 |
| ANK2 | TFF1 | CPOX |
| KRT14 | TOP1 | GALNT3 |
| TEK | ANK2 | PRL |
| YY1 | WFDC2 | HDAC8 |
| GLI2 | AREG | GHRL |
| DSG2 | IL12RB2 | DSG2 |
| FOLR1 | ROBO2 | NPM1 |
| COL9A1 | FOLR1 | PLCB1 |
| BGN |  | MKI67 |
| ACAN |  | PGR |
| TNFSF12 |  | HAVCR1 |
| PLAUR |  | NCAM1 |
| TLR1 |  | IL17RA |
| CNTN1 |  | AREG |
| ROBO2 |  | GSR |
| IL12RB2 |  | HYAL1 |
| NCAM1 |  | IL12RB2 |
| APOA4 |  | ITGAL |
| CCL22 |  | C1QA |
| DCN |  | SCGB3A2 |
| ALPP |  | ITPA |
| CEACAM5 |  | TNFSF12 |
| SCGB3A2 |  | PLAUR |
| TNFRSF10B |  | CCN4 |
| HDAC8 |  | CEACAM5 |
| IL19 |  | ALPP |
| MKI67 |  | VEGFD |
| MSTN |  | RNF31 |
| MYOC |  |  |
| MERTK |  |  |
| GAL |  |  |
| PGR |  |  |
| OCLN |  |  |
| TNFRSF4 |  |  |
| ROBO1 |  |  |
| GALNT3 |  |  |
| FGF21 |  |  |
| AREG |  |  |
| OSM |  |  |
| CD5 |  |  |
| PLCB1 |  |  |
| LTA4H |  |  |
| ITGB6 |  |  |
| GAD2 |  |  |
| AOC3 |  |  |
| CA4 |  |  |
| TFF1 |  |  |
| TNFRSF6B |  |  |
| CBLIF |  |  |
| CCNE1 |  |  |
| FABP2 |  |  |
| TP53BP1 |  |  |
| MCAM |  |  |
| MLN |  |  |
| MSMB |  |  |
| DPP6 |  |  |
| GLO1 |  |  |
| ARNT |  |  |
| WFDC2 |  |  |
| PIGR |  |  |
| TNFSF13 |  |  |
| TOP1 |  |  |
| GZMA |  |  |
| BLMH |  |  |
| SYNGAP1 |  |  |
| POLR2A |  |  |
| CD200 |  |  |
| FOLH1 |  |  |
| KLKB1 |  |  |
| CXCL16 |  |  |
| MMP10 |  |  |
| TREH |  |  |
| DNM3 |  |  |
| KLRD1 |  |  |
| GPD1 |  |  |
| IGFBP4 |  |  |
| OMG |  |  |
| GPC1 |  |  |

**Supplement Table 4 the difference of chemical pollutants between different groups in NHANES**

| chemical pollutants | No-smoking | Late-smoking | Early-smoking | F-value | P-value |
| --- | --- | --- | --- | --- | --- |
| Lead | 1.81 | 1.82 | 2.05 | 31.62 | <0.001 |
| Cadmium | 0.52 | 0.60 | 0.64 | 8.05 | <0.001 |
| Perfluorooctanoic acid | 3.71 | 3.52 | 3.99 | 4.76 | 0.009 |
| Perfluoroheptanoic acid | 0.15 | 0.16 | 0.17 | 8.25 | <0.001 |
| Perfluorononanoic acid | 1.17 | 1.16 | 1.27 | 4.06 | 0.017 |
| Perfluorododecanoic acid | 0.093 | 0.094 | 0.10 | 2.92 | 0.050 |
| Mono-n-octyl phthalate | 0.89 | 0.95 | 0.96 | 7.09 | <0.001 |

**Supplement Table 5 Mediation effect analysis: The direct effect of early smoking on chronic lower respiratory diseases and death and the indirect effect through chemical pollutants**

| chemical pollutants | disease | average direct effects | average causal mediation effects | Prop Mediated (%) | P-value |
| --- | --- | --- | --- | --- | --- |
| Lead | COPD | 2.69×10-2 | 4.13×10-5 | 0.15 | 0.341 |
| asthma | 1.61×10-2 | 6.67×10-5 | 0.42 | 0.340 |
| Chronic bronchitis | 2.00×10-2 | 5.13×10-5 | 0.26 | 0.320 |
| Chronic lower respiratory disease-death | 5.51×103 | 2.68 | 0.05 | 0.624 |
| Perfluorooctanoic acid | COPD | 1.80×10-2 | 1.05×10-4 | 0.59 | 0.520 |
| asthma | 1.07×10-2 | 2.69×10-4 | 2.57 | 0.823 |
| Chronic bronchitis | 1.32×10-2 | 1.01×10-4 | 0.77 | 0.424 |
| Chronic lower respiratory disease-death | 6.05×103 | 16.93 | 0.17 | 0.724 |
| Perfluoroheptanoic acid | COPD | 1.75×10-2 | 2.91×10-4 | 1.64 | 0.142 |
| asthma | 1.09×10-2 | 3.64×10-4 | 3.44 | 0.241 |
| Chronic bronchitis | 1.28×10-2 | 1.56×10-4 | 1.20 | 0.400 |
| Chronic lower respiratory disease-death | 6.77×103 | 1.20 | 0.04 | 0.924 |
| Perfluorononanoic acid | COPD | 2.35×10-2 | 1.99×10-4 | 0.85 | 0.242 |
| asthma | 1.09×10-2 | 3.16×10-4 | 2.98 | 0.121 |
| Chronic bronchitis | 1.70×10-2 | 8.42×10-5 | 0.50 | 0.560 |
| Chronic lower respiratory disease-death | 3.40×103 | 49.29 | 1.39 | 0.140 |
| Perfluorododecanoic acid | COPD | 2.22×10-2 | 1.44×10-5 | 0.07 | 0.944 |
| asthma | 1.08×10-2 | 1.11×10-5 | 1.04 | 0.703 |
| Chronic bronchitis | 1.53×10-2 | 1.69×10-7 | 0.001 | 0.900 |
| Chronic lower respiratory disease-death | 4.60×103 | 3.92 | 0.02 | 0.928 |
| Mono-n-octyl phthalate | COPD | 2.85×10-2 | 1.15×10-4 | 0.40 | 0.623 |
| asthma | 1.45×10-2 | 4.72×10-4 | 3.36 | 0.363 |
| Chronic bronchitis | 1.85×10-2 | 1.07×10-4 | 0.58 | 0.562 |
| Chronic lower respiratory disease-death | 1.21×103 | 40.20 | 2.54 | 0.320 |

**Supplement Table 6 34 common targets identified as essential targets shared with cadmium’s targets, proteomics assays and chronic lower respiratory diseases targets**

| Target | Target | Target | Target |
| --- | --- | --- | --- |
| HMOX1 | BCL2 | ITGAM | GSN |
| NOTCH1 | EDN1 | ACVRL1 | HAVCR1 |
| NOTCH2 | ICAM1 | POMC | IL12RB2 |
| EGFR | NOTCH3 | ITPR1 | NCAM1 |
| MAPT | SCGB1A1 | NPM1 | DCN |
| ENG | ESR1 | IL7 | MKI67 |
| NPC2 | IL7R | GSR | AREG |
| MMP9 | FASLG | IL15 |  |
| BDNF | GSTP1 | CEBPA |  |
